# Supplementary material
Source: PubMed Central journal article supplement (PMC2744830)
Supplement: 125_2009_1467_MOESM1_ESM.pdf [file 125_2009_1467_MOESM1_ESM.pdf]

## **Electronic supplementary material**

### *Membership of Low-Protein Diet Study Group*

The Group also included the following members:

Akita Medical Center: T. Fukushima

Fukushima Medical University: K. Kato, T. Watanabe, K. Nakamura

Niigata University Graduate School of Medical and Dental Sciences: A. Saito, Y. Kobayashi

Chiba Higashi Hospital: M. Nishimura, S. Kuwabara

Juntendo University: T. Shike, H. Hayashino, S. Ozaki, K. Suzuki, R. Ikeda

Tokai University: M. Yagame, H. Sakai, H. Fujii

Kanazawa National Hospital: H. Kida, A. Hisada, N. Tsuchiyama, M. Yoshizawa, T. Yamamoto

Nara Medical University: M. Kanauchi, K. Harano

Nagasaki University: K. Harada, S. Akizawa, E. Kawasaki, N. Matsushita

Ohara General Hospital: M. Tani, M. Abe

Kimitsu Chuou Hospital: D. Uchida, K. Ejiri

Misyuku Hospital: T. Kubota, H. Iwaoka, S. Araki, K. Majima

Honatsugi Medical Clinic: H. Kaneshige, H. Takuma

Kurobe City Hospital: Y. Ieki, E. Takazakura, A. Yuki

Second Okamoto Hospital: Y. Kida, M. Sakaguchi, R. Tagawa

Osaka Rosai Hospital: M. Nomura, S. Okada

Sasebo City Hospital: S. Namie, S. Nakagawa

Niigata Toyosaka Hospital: R. Kakisawa, H. Kosaka

Asahikawa Red-Cross Hospital: A. Morikawa, T. Sasaki

Ohgaki City Hospital: T. Aoki, A. Shimizu

Toride Kyodo General Hospital: T. Shiigai, T. Kobayashi, K. Kobayashi

Osaka City General Hospital: M. Imanishi, N. Okada, K. Fujiwara, S. Yabuuchi

Gunma University: T. Utsuki, Y. Sato, H. Kuwabara

Saiseikai Central Hospital: S. Kuriyama, K. Nakamura

Kitasato University: T. Moriya, T. Sato

Oyodo Hospital: K. Nishiura, S. Hayashino

Shiga University of Medical Science: H. Iwakawa
